# Supplementary material for: Whole-organism 3D quantitative characterization of zebrafish melanin by silver deposition micro-CT
Source: eLife. 2021 Sep 16;10:e68920. doi: 10.7554/eLife.68920 (PMC8445617; doi:10.7554/eLife.68920)
Supplement: Figure 2—source data 1. [file elife-68920-fig2-data1.xlsx]

## Sheet: Sheet1
wt #1	wt #2	wt #3	Overall Average	S.D. (+/-)
9.99	10.43	10.57	9.28933	1.23109
10.46	8.48	10.94
10.16	10.41	10.34
9.66	9.78	9.37
10.72	9.45	9.77
8.02	9.91	7.43
9.59	8.45	9.88
9.69	7.64	8.34
10.85	8.38	7.66
13.08	8.82	8.22
10.63	10.67	10.26
10.27	7.52	8.55
9.62	8.92	8.48
9.99	8.5	6.96
9.81	7.89	9.89
10.57	13.3	7.89
9.32	10.46	10.11
7.75	8.22	9.22
10.82	7.75	8.72
10.23	9.14	10.06
8.54	8.21	9.02
9.1	7.8	9.08
8.53	7.82	7.84
9.45	9.77	8.52
7.87	7.52	9.62
