# Supplementary material for: Whole-organism 3D quantitative characterization of zebrafish melanin by silver deposition micro-CT
Source: eLife. 2021 Sep 16;10:e68920. doi: 10.7554/eLife.68920 (PMC8445617; doi:10.7554/eLife.68920)
Supplement: Table 1—source data 1. [file elife-68920-table1-data1.xlsx]

## Sheet: Sheet1
Specimen	wt #1	wt #2	wt #3	wt Average	S.D. (+/-)
Pigment Region	Segmented Volume (µm3)
Total	4.81261e+06	4.52371e+06	5.27293e+06	4.86975e+06	377865
RPE (right)	1.2033e+06	1.02257e+06	1.27651e+06	1.16746e+06	130711
RPE (left)	1.24943e+06	964576	1.46126e+06	1.22509e+06	249236
Dorsal Stripe	545441	487260	510985	514562	29255
Ventral Stripe	1.40688e+06	1.5564e+06	1.62167e+06	1.52832e+06	110117
Yolk Sac Stripe	228825	363388	205678	265964	85162
Lateral Stripe (right)	52441.4	41026.9	67340.9	53603.1	13195.4
Lateral Stripe (left)	59082.3	29626.4	61594.8	50101.2	17776.1
Other	67209.5	58864.5	67885.3	64653.1	5024.4
Pigment Region	Cumulative Sum of Intensity (normalized units)
Total	505334686000	470665376000	472890158300	4.82963e+11	1.9406e+10
RPE (right)	148485240000	143290990000	139632970000	1.43803e+11	4.4483e+09
RPE (left)	174322350000	146697760000	157178020000	1.59399e+11	1.39456e+10
Dorsal Stripe	48810881000	40159785000	40131047000	4.30339e+10	5.00303e+09
Ventral Stripe	100851060000	106391040000	106401220000	1.04548e+11	3.20145e+09
Yolk Sac Stripe	16690282000	23250780000	14228976000	1.80567e+10	4.66353e+09
Lateral Stripe (right)	5299908600	3639217900	5524523500	4.82122e+09	1.02978e+09
Lateral Stripe (left)	5142875100	2327220200	4582285300	4017460200	1.49039e+09
Other	5732089300	4908582900	5211116500	5.28393e+09	4.16554e+08
