# Supplementary material for: Whole-organism 3D quantitative characterization of zebrafish melanin by silver deposition micro-CT
Source: eLife. 2021 Sep 16;10:e68920. doi: 10.7554/eLife.68920 (PMC8445617; doi:10.7554/eLife.68920)
Supplement: Table 3—source data 1. [file elife-68920-table3-data1.xlsx]

## Sheet: Sheet1
Specimen	slc24a5b1/b1 #1	slc24a5b1/b1 #2	slc24a5b1/b1 #3	slc24a5b1/b1 Average	S.D. (+/-)
Pigment Region	Segmented Volume (µm3)
Total	1.14096e+06	1.32406e+06	1.14101e+06	1.20201e+06	105696
RPE (right)	344581	459837	449497	417972	63768.4
RPE (left)	408323	415649	405002	409658	5447.68
Dorsal Stripe	97028.5	173892	83612.1	118177	48714.1
Ventral Stripe	232529	205534	143544	193869	45624.7
Yolk Sac Stripe	39712.2	39309.1	20701.9	33241	10861.1
Lateral Stripe (right)	4796.7	7575.11	4525.61	5632.47	1687.83
Lateral Stripe (left)	7155.26	9091.57	3990.74	6745.86	2574.94
Other	6833.13	13167	30136.1	16712.1	12049.2
Pigment Region	Cumulative Sum of Intensity (normalized units)
Total	75413111000	85132595270	74976816050	78507507440	5.74164e+09
RPE (right)	24331246000	31653982000	31072209000	2.90191e+10	4.07025e+09
RPE (left)	29773920000	31726170000	28370035000	2.99567e+10	1.68552e+09
Dorsal Stripe	5890231300	8872478700	5279561200	6.68076e+09	1.92249e+09
Ventral Stripe	11615169000	9443057700	7103616500	9.38728e+09	2.25629e+09
Yolk Sac Stripe	2589991900	1841591900	1261461400	1.89768e+09	6.66039e+08
Lateral Stripe (right)	310585660	407258620	274772610	3.30872e+08	6.85332e+07
Lateral Stripe (left)	481020900	452190750	243505540	3.92239e+08	1.29611e+08
Other	420946240	735865600	1371654800	8.42822e+08	4.84295e+08
