# Supplementary material for: Whole-organism 3D quantitative characterization of zebrafish melanin by silver deposition micro-CT
Source: eLife. 2021 Sep 16;10:e68920. doi: 10.7554/eLife.68920 (PMC8445617; doi:10.7554/eLife.68920)
Supplement: Table 4—source data 1. [file elife-68920-table4-data1.xlsx]

## Sheet: Sheet1
Specimen	mitfaw2/w2 #1§	mitfaw2/w2 #2§	mitfaw2/w2 #3§	mitfaw2/w2 Average	S.D. (+/-)
Pigment Region	Segmented Volume (µm3)
Total	1.64424e+06	2.02846e+06	1.71937e+06	1.79736e+06	203639
RPE (right)	798946	1.0009e+06	792820	864222	118406
RPE (left)	841073	1.02255e+06	921264	928295	90941.5
Other	4217.82	5016.75	5289.25	4841.27	556.854
Pigment Region	Cumulative Sum of Intensity (normalized units)
Total	196770044220	263788449540	191002155630	217186883130	4.04611e+10
RPE (right)	101128420000	132800940000	88039498000	1.07323e+11	2.30147e+10
RPE (left)	95401927000	130717900000	102685520000	1.09602e+11	1.86462e+10
Other	239697220	269609540	277137630	262148130	1.98041e+07
Note: § indicates head segment only analyzed
